# Supplementary material for: Self-assembly of highly asymmetric, poly(ionic liquid)-rich diblock copolymers and the effects of simple structural modification on phase behaviour
Source: Royal Society of Chemistry journal article supplement (doi:10.1039/c8py01414k), 2019-01-01
Supplement: c8py01414k1.pdf [file c8py01414k1.pdf]

# Supporting Information

for

## Self-Assembly of Highly Asymmetric, Poly(Ionic Liquid)-rich Diblock Copolymers and the Effects of Simple Structural Modification on Phase Behavior

*Alyssa W. May,<sup>1</sup> Zhangxing Shi,<sup>2</sup> Dilanji B. Wijayasekara,<sup>3</sup> Douglas L. Gin,<sup>2,4</sup> and Travis S. Bailey<sup>1,3,5,\*</sup>*

<sup>1</sup>Dept. of Chemistry, <sup>2</sup>Dept. of Chemical and Biological Engineering, and <sup>3</sup>School of Advanced Materials Discovery, Colorado State University, Fort Collins, Colorado, 80523, USA

<sup>4</sup>Dept. of Chemistry and Biochemistry, and <sup>5</sup>Dept. of Chemical and Biological Engineering, University of Colorado, Boulder, Colorado, 80309, USA

### 1) Determination of the DP and $M_n$ values of the series of PS macro-initiators **3**.

**Table S1.** DP,  $M_n$ , and PDI values of the PS macro-initiators **3**. The  $M_n$  values are rounded down to nearest hundred g/mol.

| BCP       | DP | $M_n$ (g/mol) | PDI  |
|-----------|----|---------------|------|
| <b>3a</b> | 15 | 1,800         | 1.15 |
| <b>3b</b> | 20 | 2,400         | 1.10 |
| <b>3c</b> | 25 | 2,900         | 1.12 |
| <b>3d</b> | 30 | 3,400         | 1.08 |
| <b>3e</b> | 34 | 3,800         | 1.12 |
| <b>3f</b> | 36 | 4,000         | 1.13 |
| <b>3g</b> | 37 | 4,100         | 1.13 |
| <b>3h</b> | 40 | 4,400         | 1.11 |
| <b>3i</b> | 45 | 5,000         | 1.13 |

The PS macro-initiators **3a-i** were synthesized using the procedures previously reported.<sup>1</sup> The DP and  $M_n$  values of the synthesized PS macro-initiators **3a-i** were calculated based on the  $^1\text{H}$  NMR peak integral of protons ( $D$ ) on the TMS end-group relative to that of the protons ( $E$ ) on the benzene ring for these polymers (Eqs. 1 and 2).<sup>1</sup> See Figure S1 below for example data used to calculate these values for **3h**.

$$\text{DP} = \frac{E_{\text{H NMR Integral}} \times 9}{D_{\text{H NMR Integral}} \times 5} \quad (\text{Eq. 1})$$

$$M_n = (\text{DP} \times M_{\text{monomer}}) + M_{\text{TMS-EBMP}} \quad (\text{Eq. 2})$$

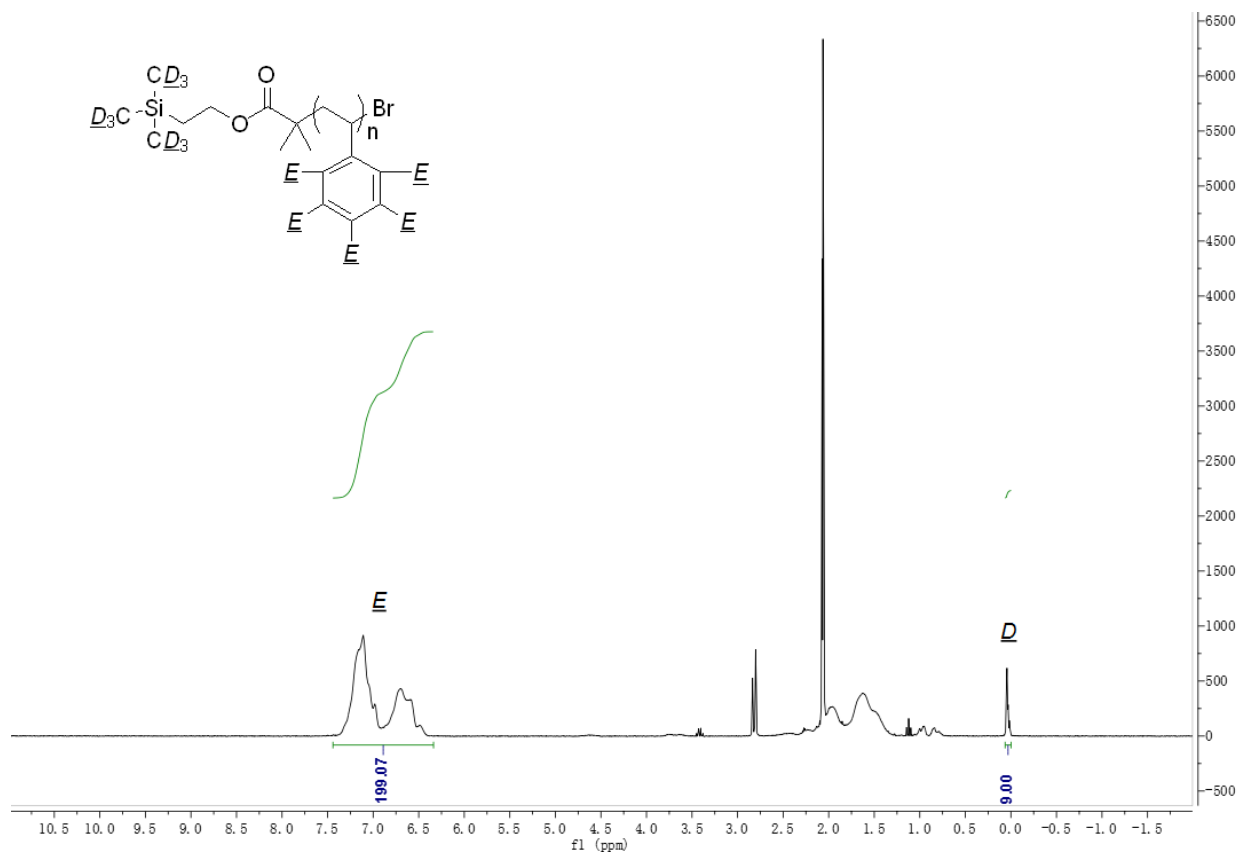

**Figure S1.** Example  $^1\text{H}$  NMR spectrum of **3h**, and the  $^1\text{H}$  NMR peak assignments used for calculating the DP and  $M_n$  value. Calculated DP = 39.8  $\cong$  40,  $M_n$  = 4,433  $\cong$  4,400 g/mol.

**2) Determination of the block composition ratio and  $M_n$  values of the series of PS-PIL BCPs 1.**

**Table S2.** Block composition ratios and  $M_n$  values of PS-PIL BCPs 1. The  $M_n$  values are rounded down to nearest hundred g/mol.

| <b>BCP</b> | <b>n</b> | <b>m</b> | <b><math>M_n</math> (g/mol)</b> |
|------------|----------|----------|---------------------------------|
| <b>1a</b>  | 15       | 35       | 18,600                          |
| <b>1b</b>  | 20       | 30       | 16,700                          |
| <b>1c</b>  | 25       | 25       | 14,900                          |
| <b>1d</b>  | 30       | 18       | 12,000                          |
| <b>1e</b>  | 34       | 15       | 11,000                          |
| <b>1f</b>  | 36       | 14       | 10,800                          |
| <b>1g</b>  | 37       | 13       | 10,400                          |
| <b>1h</b>  | 40       | 12       | 10,200                          |
| <b>1i</b>  | 34       | 10       | 8,600                           |
| <b>1j</b>  | 40       | 10       | 9,200                           |
| <b>1k</b>  | 40       | 9        | 8,700                           |
| <b>1l</b>  | 40       | 8        | 8,300                           |
| <b>1m</b>  | 45       | 5        | 7,400                           |
| <b>1n</b>  | 15       | 35       | 20,100                          |
| <b>1o</b>  | 20       | 30       | 18,000                          |
| <b>1p</b>  | 25       | 25       | 15,900                          |
| <b>1q</b>  | 30       | 18       | 12,800                          |
| <b>1r</b>  | 34       | 14       | 11,100                          |
| <b>1s</b>  | 40       | 9        | 9,100                           |
| <b>1t</b>  | 45       | 5        | 7,600                           |
| <b>1u</b>  | 35       | 15       | 11,500                          |
| <b>1v</b>  | 40       | 10       | 9,500                           |
| <b>1w</b>  | 20       | 30       | 18,800                          |
| <b>1x</b>  | 25       | 25       | 16,600                          |

The block composition ratios and  $M_n$  values of PS-PIL BCPs **1a-t** were determined via  $^1\text{H}$  NMR analysis. See Figure S2 for an example spectrum and  $^1\text{H}$  NMR peaks assignments used for these calculations. The PS:PIL ratio can be calculated by Eq. 3. The length of PIL block can be calculated by Eq. 4 and confirmed by end-group analysis (Eq. 5). The  $M_n$  of PS-PIL BCPs can be calculated by Eq. 6.

$$\text{PS:PIL ratio} = \frac{[\text{F}]_{\text{H NMR Integration}} - (6 \times \text{B})_{\text{H NMR Integration}}}{\text{B}_{\text{H NMR Integration}} \times 5} \quad (\text{Eq. 3})$$

$$\text{PS block length } m = \frac{n}{\text{Styrene:imidazolium-styrene ratio}} \quad (\text{Eq. 4})$$

$$\text{PIL length } m = \frac{\text{B}_{\text{H NMR Integration}} \times 9}{\text{D}_{\text{H NMR Integration}}} \quad (\text{Eq. 5})$$

$$M_n = (n \times M_{\text{styrene}}) + (m \times M_{\text{monomer 2}}) + M_{\text{TMS-EBMP}} \quad (\text{Eq. 6})$$

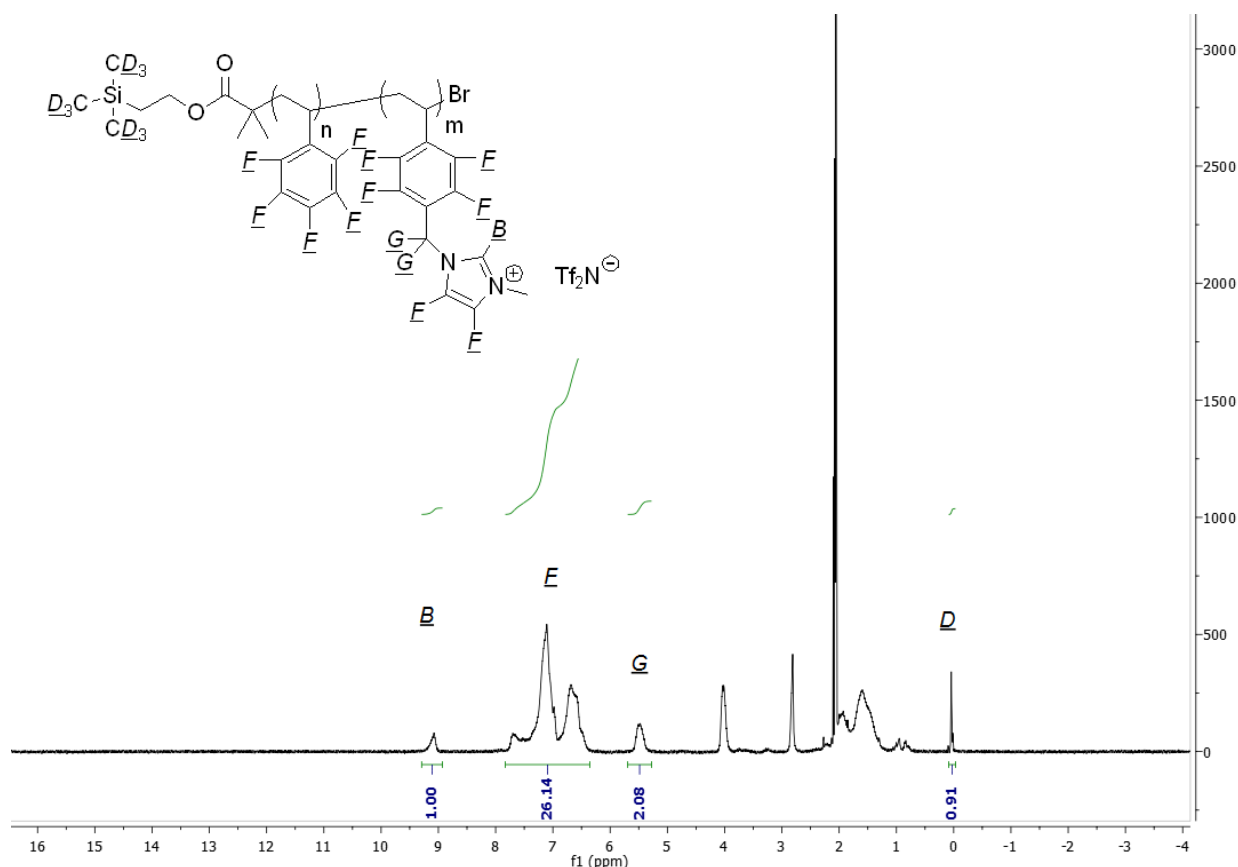

**Figure S2.** Example  $^1\text{H}$  NMR spectrum of PS-PIL BCP **1j**, and the  $^1\text{H}$  NMR peak assignments used for calculating the block composition ratio and  $M_n$  value. The calculated PS:PIL is 4.02,  $m = 9.93 \cong 10$ ,  $M_n = 9,227 \cong 9,200$  g/mol.

### 3) Temperature-dependent SAXS profiles for PS-PIL BCPs 1a-x.

For a complete description of the SAXS analysis procedures, see the Experimental Section in the main publication.

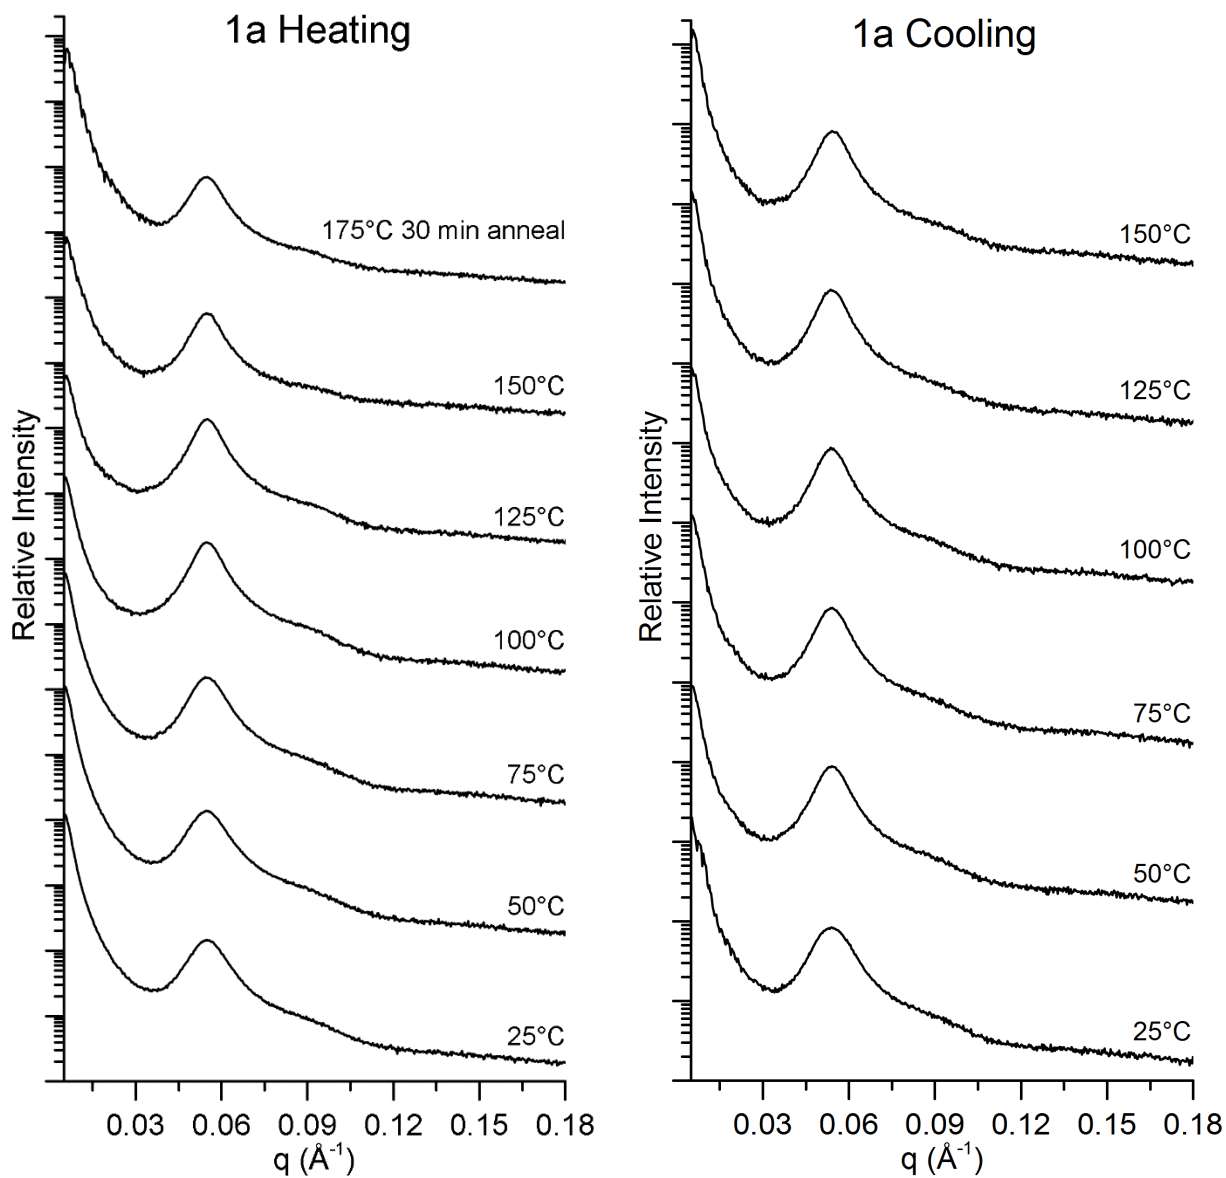

**Figure S3.1.** Temperature-dependent SAXS profiles for PS-PIL BCP sample 1a.

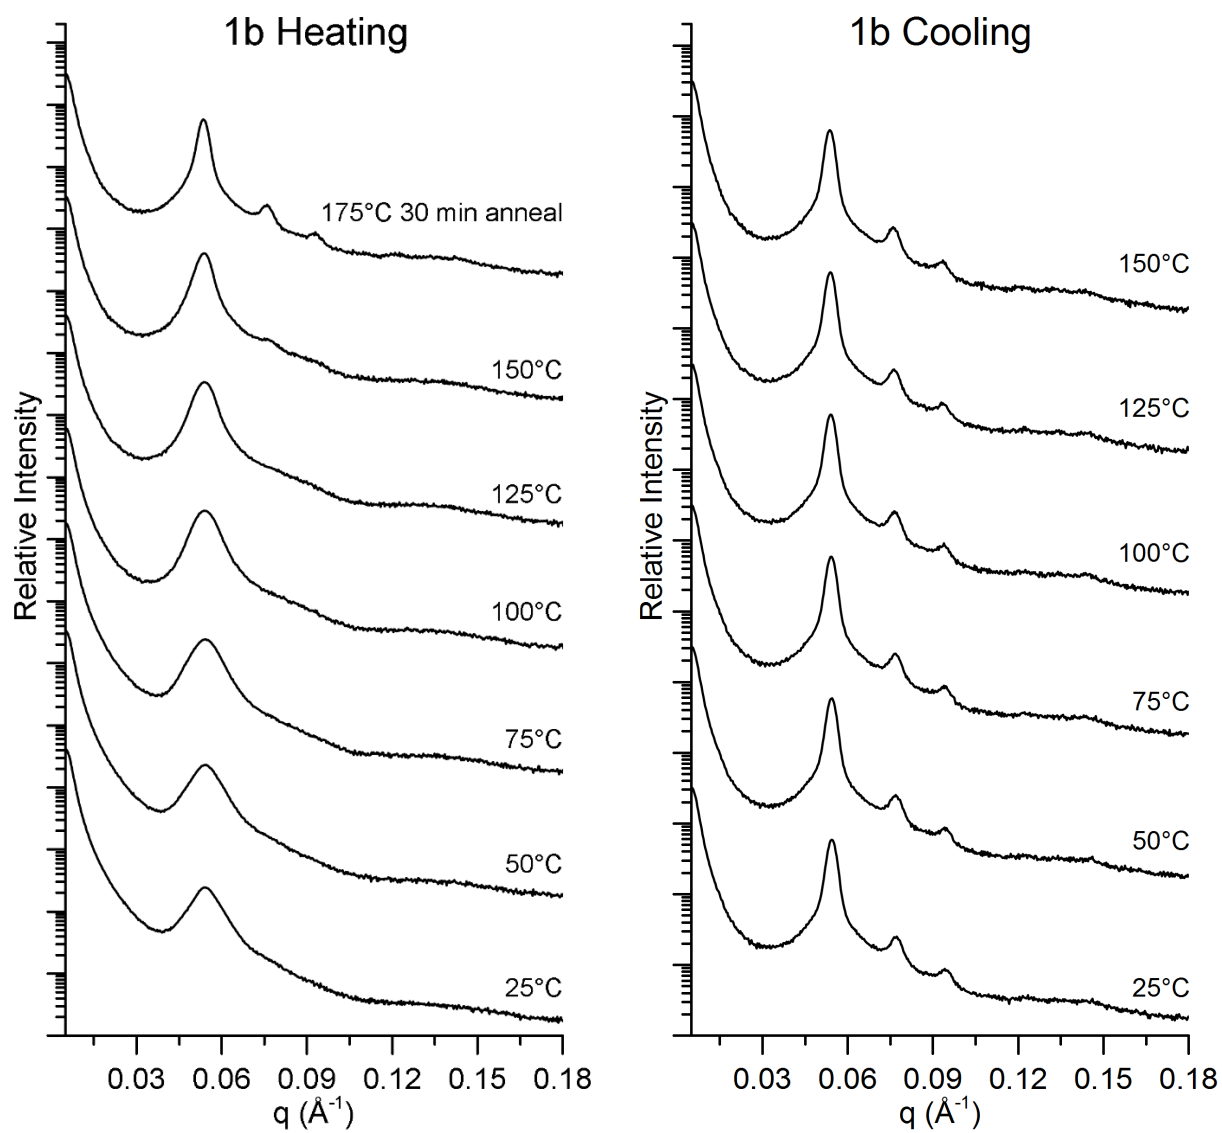

**Figure S3.2.** Temperature-dependent SAXS profiles for PS-PIL BCP sample **1b**.

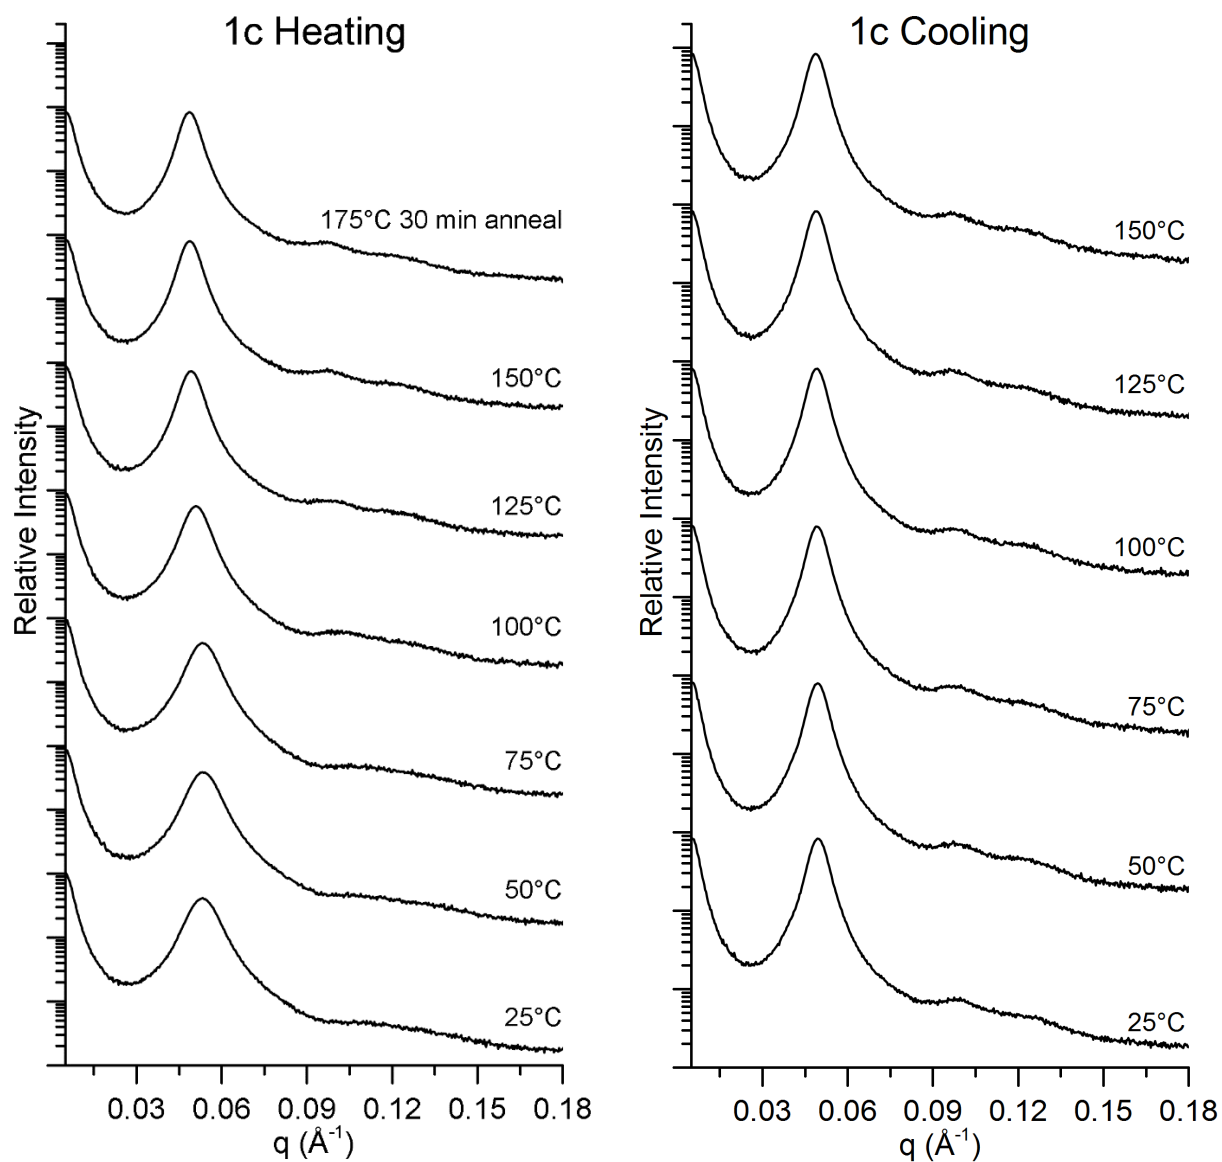

**Figure S3.3.** Temperature-dependent SAXS profiles for PS-PIL BCP sample **1c**.

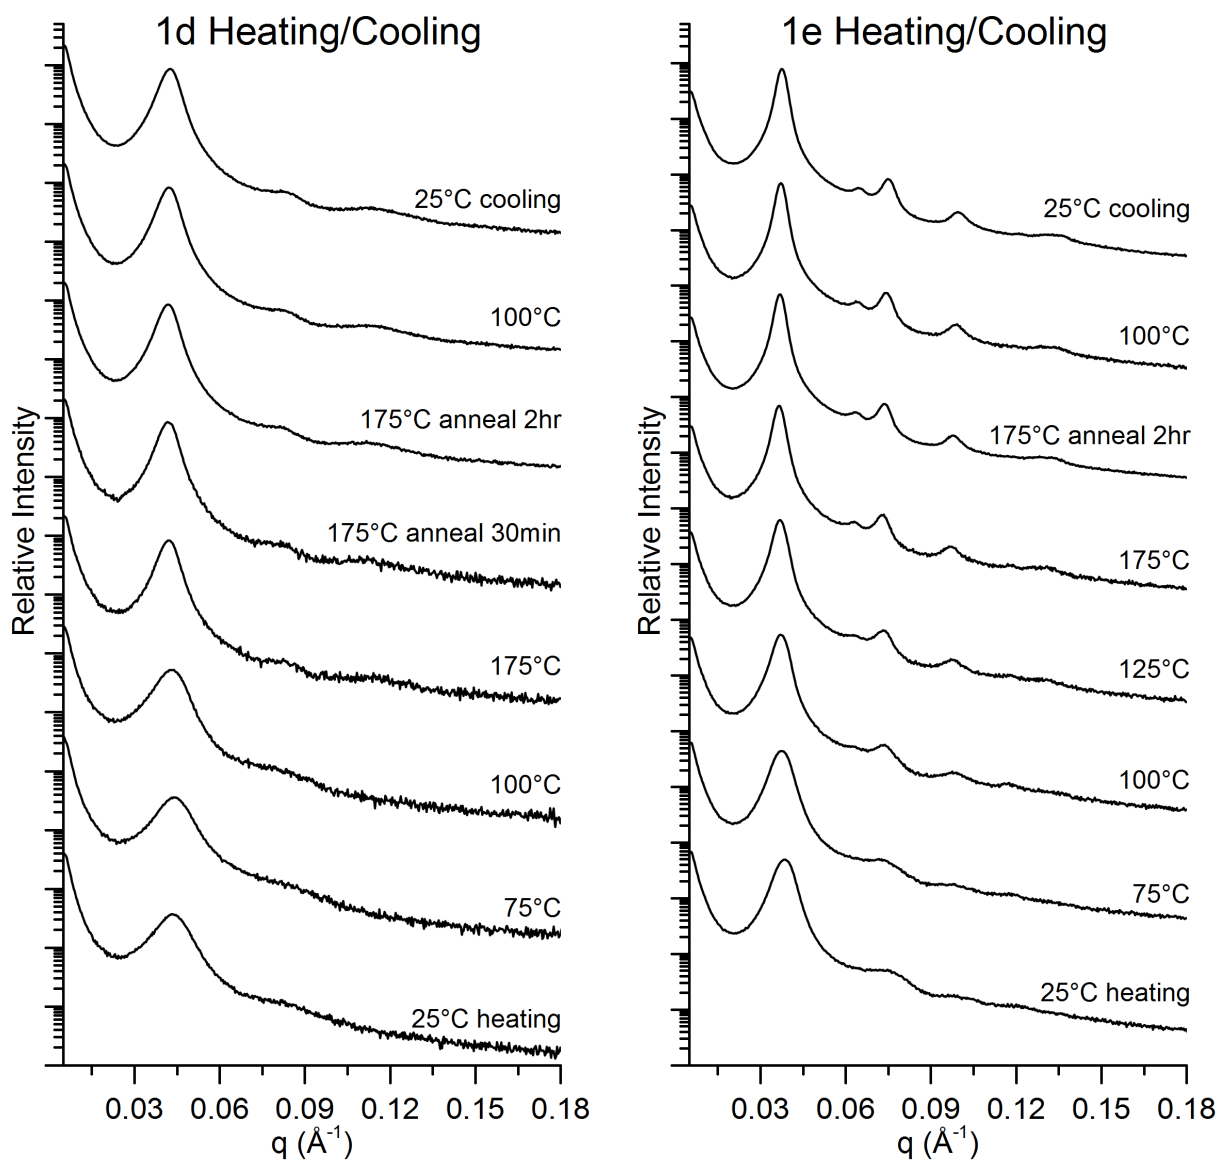

**Figure S3.4** Temperature-dependent SAXS profiles for PS-PIL BCP samples **1d** and **1e**.



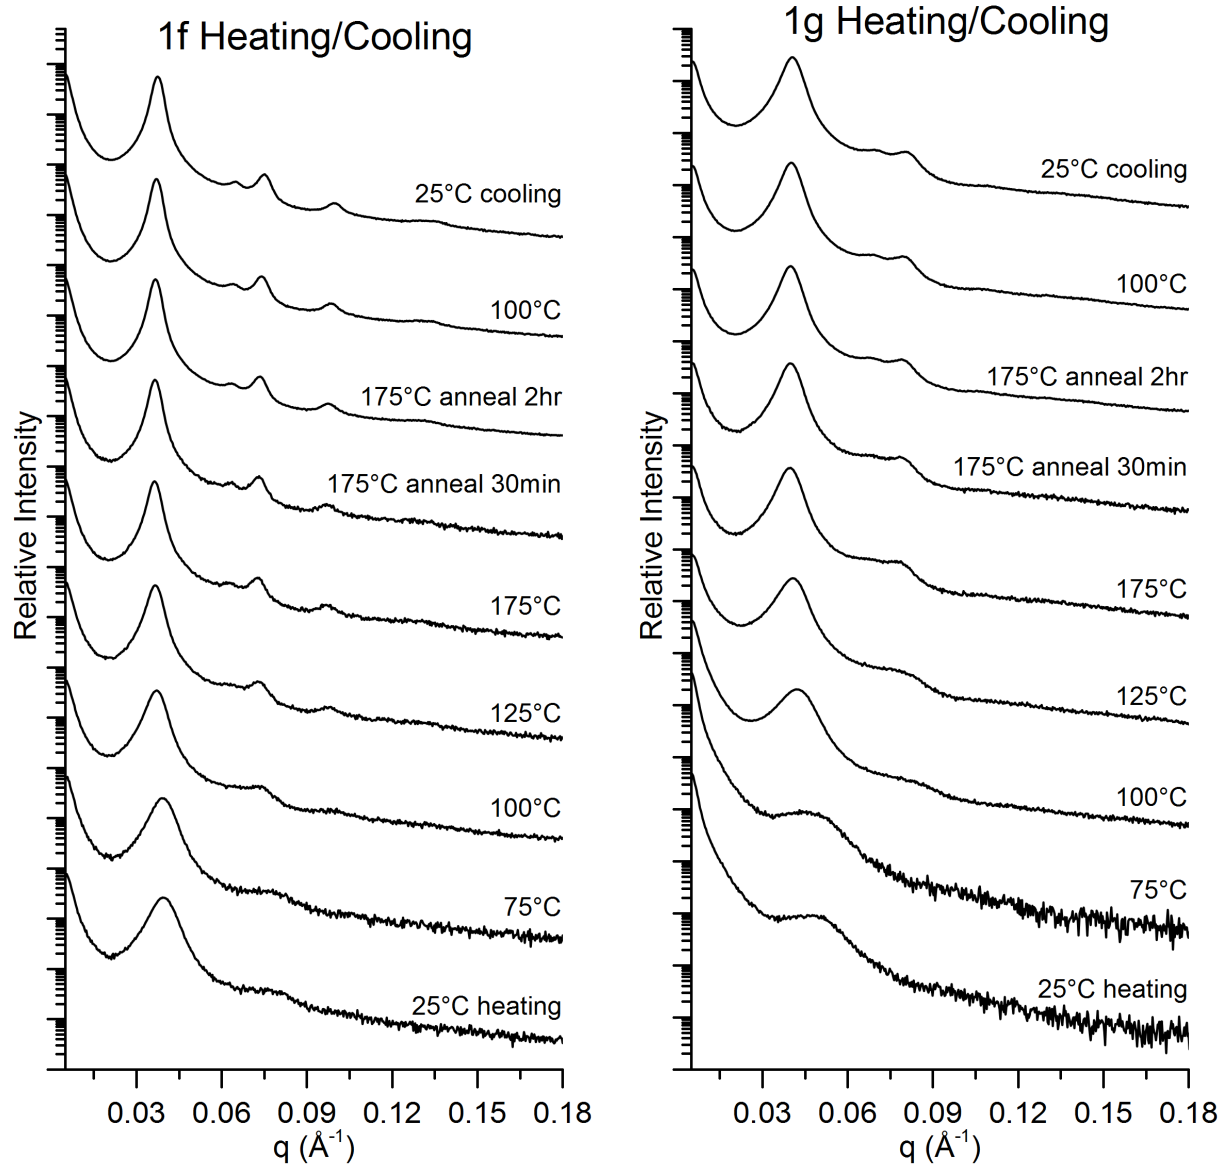

**Figure S3.5** Temperature-dependent SAXS profiles for PS-PIL BCP samples **1f** and **1g**.

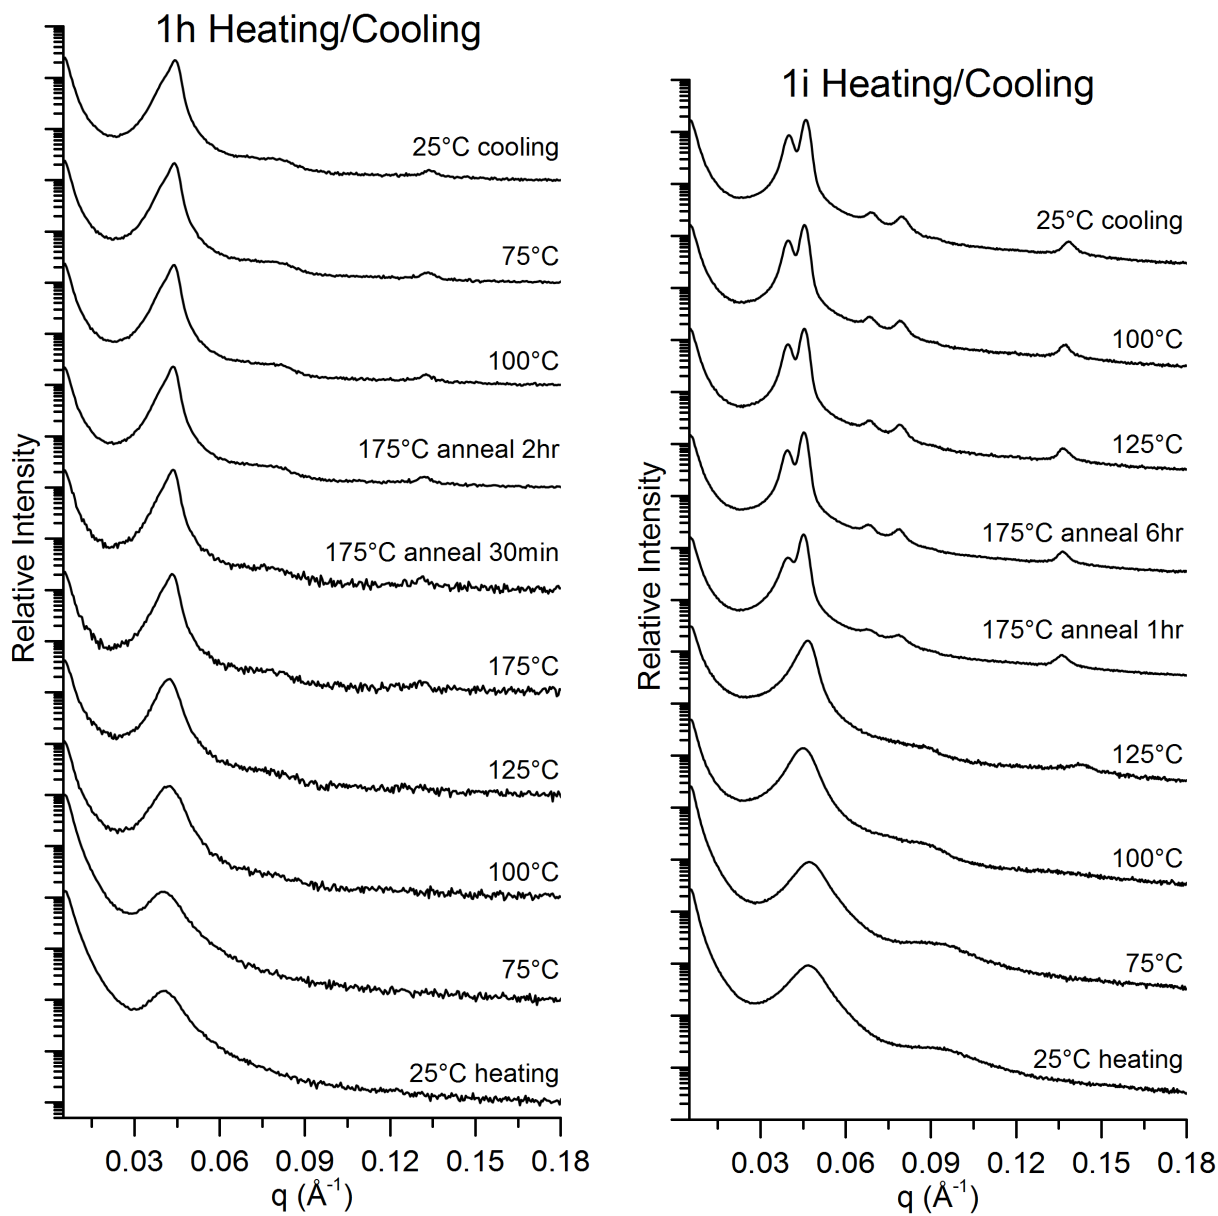

**Figure S3.6** Temperature-dependent SAXS profiles for PS-PIL BCP samples **1h** and **1i**.

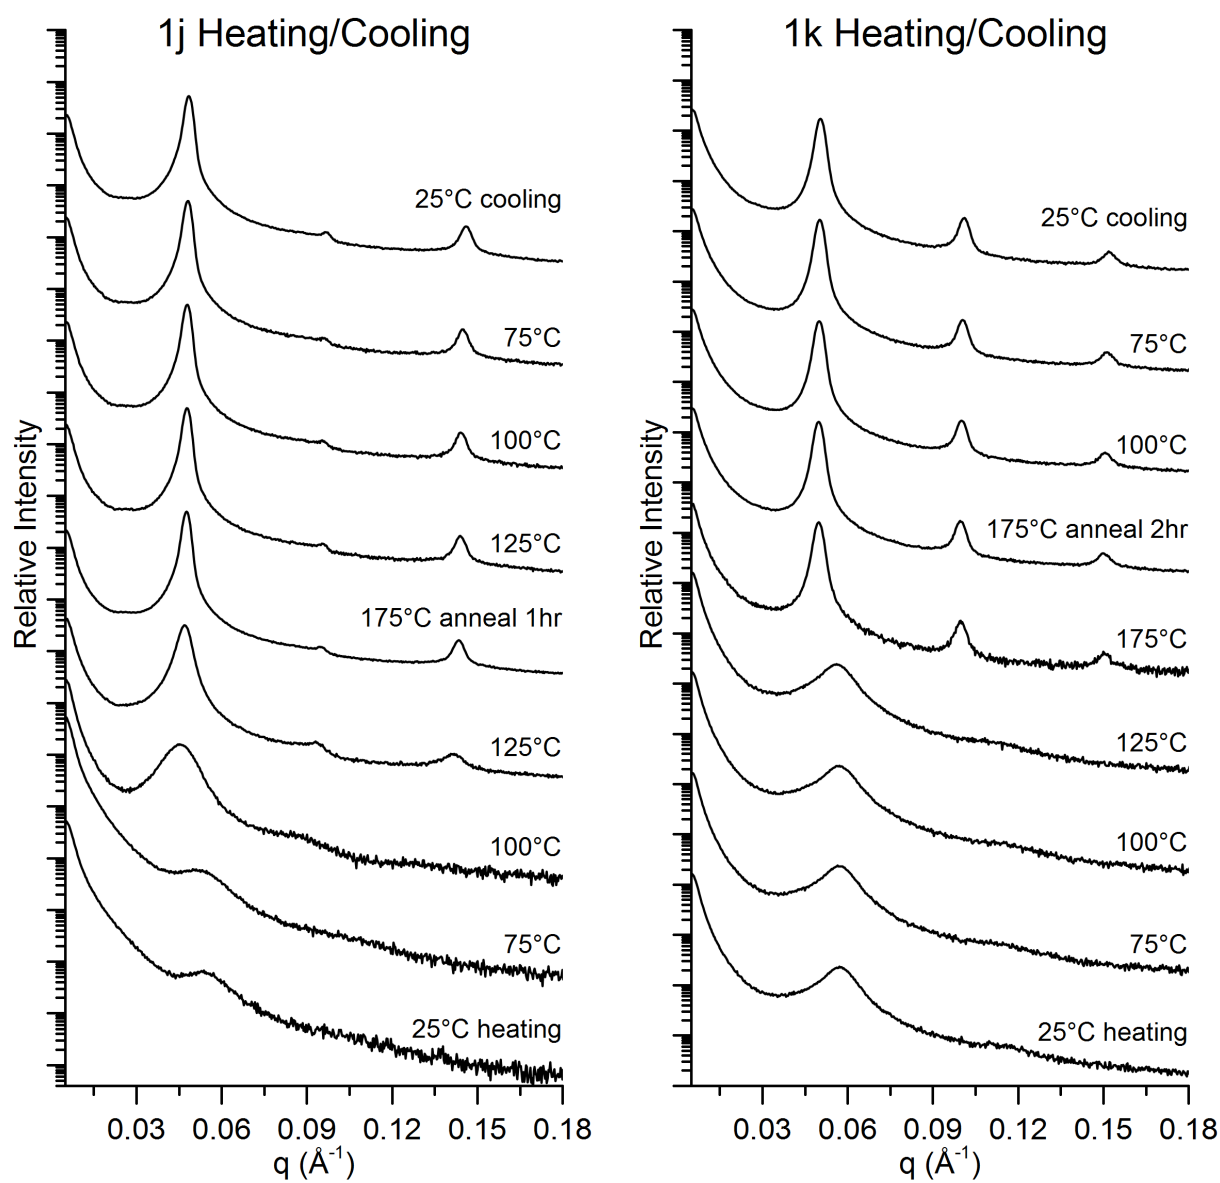

**Figure S3.7** Temperature-dependent SAXS profiles for PS-PIL BCP samples **1j** and **1k**.

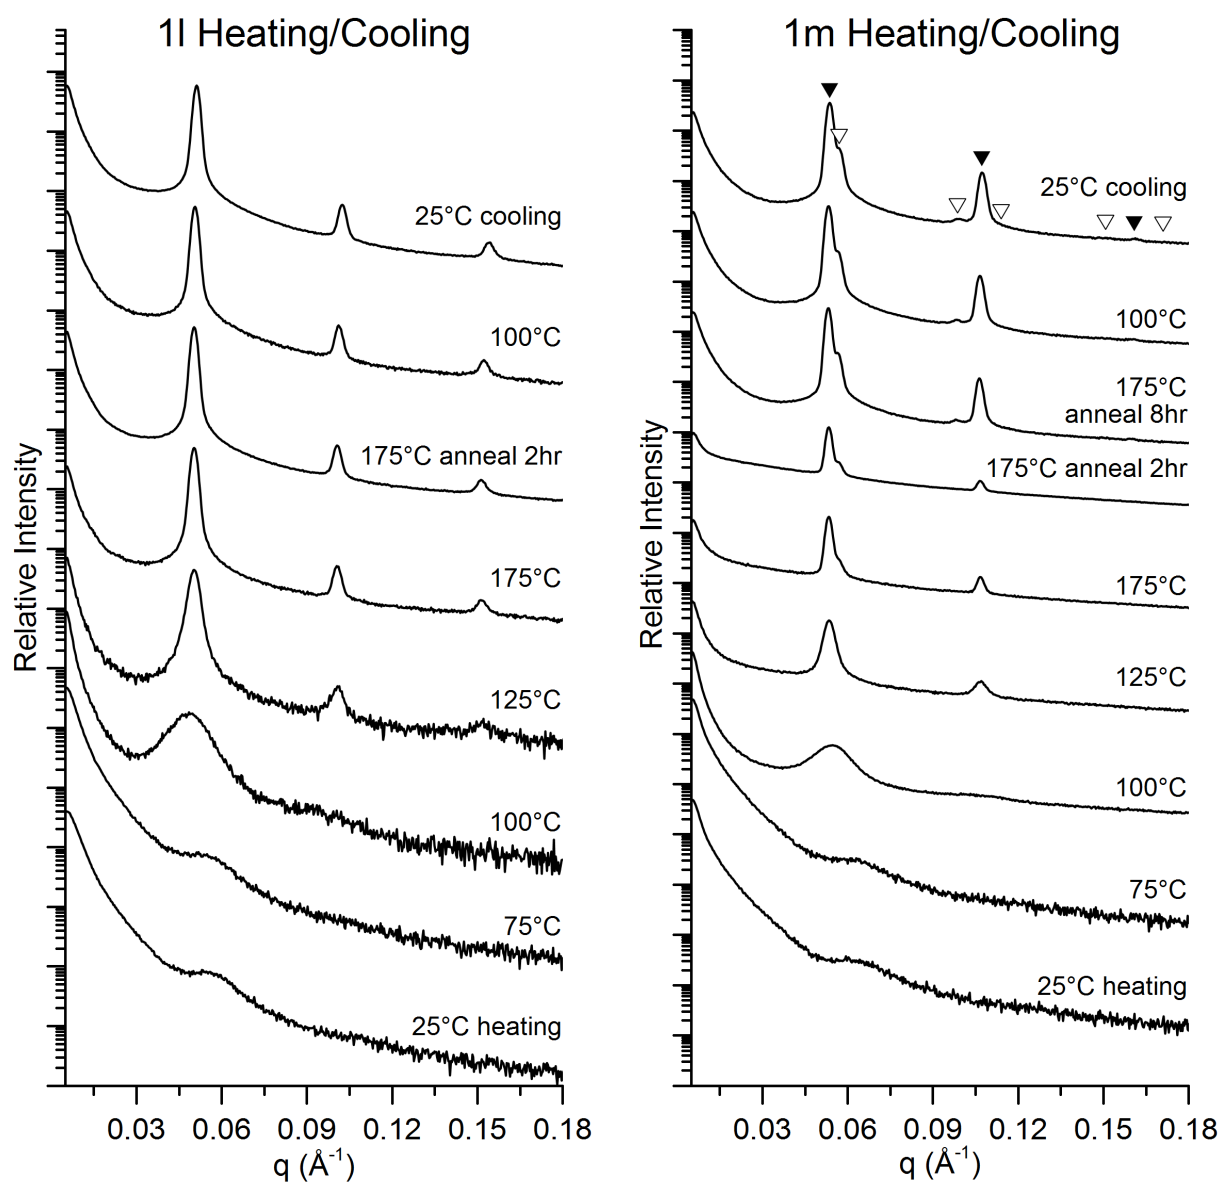

**Figure S3.8** Temperature-dependent SAXS profiles for PS-PIL BCP samples **1l** and **1m**.

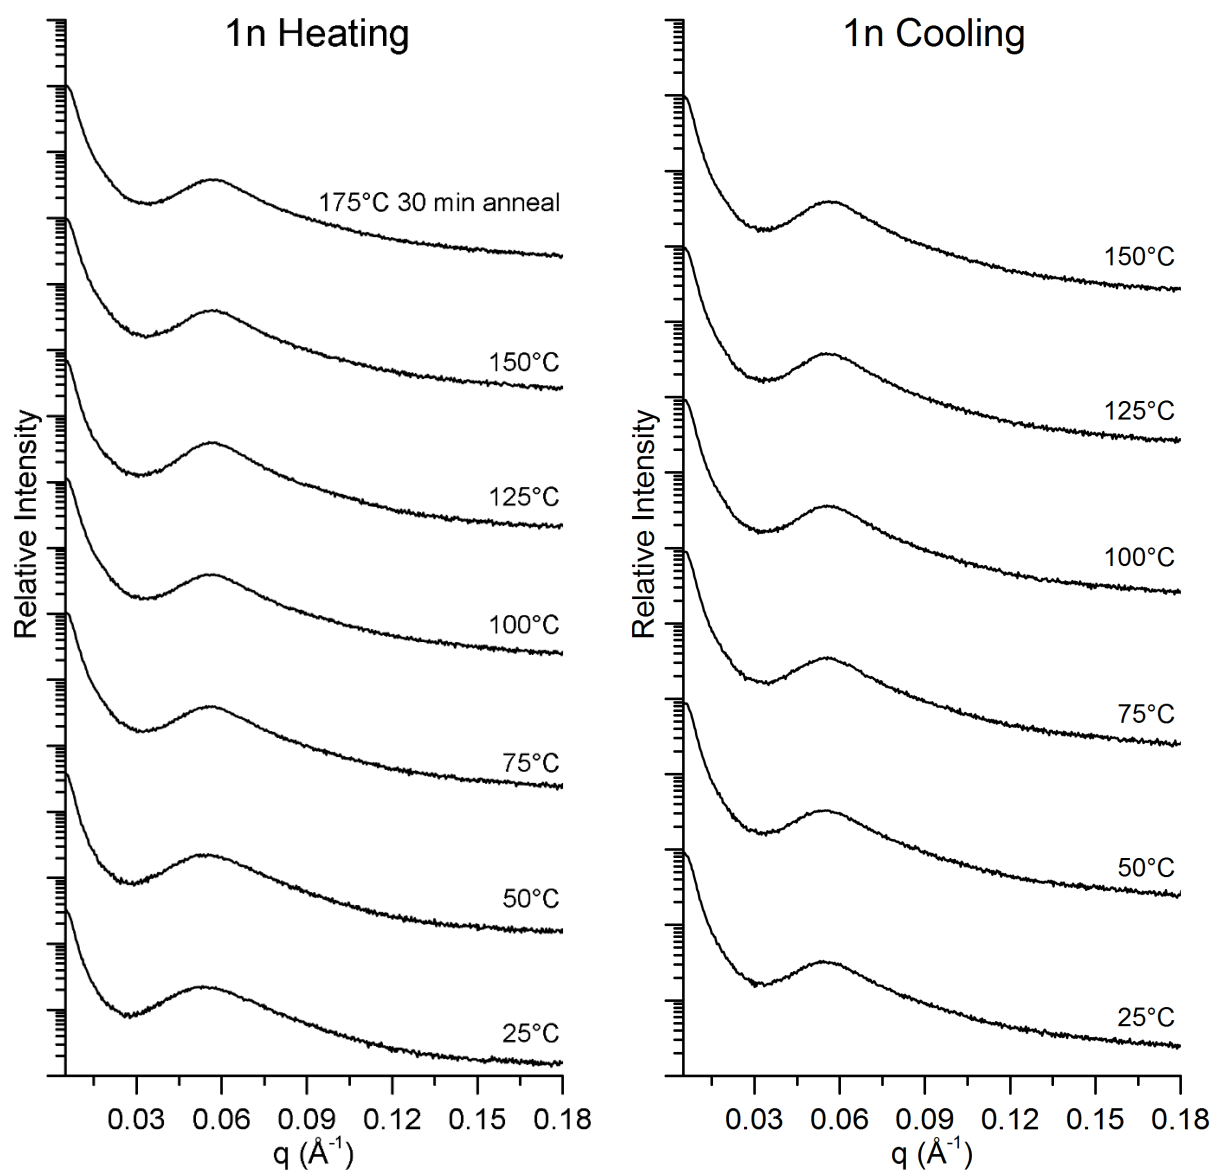

**Figure S3.9** Temperature-dependent SAXS profiles for PS-PIL BCP sample **1n**.

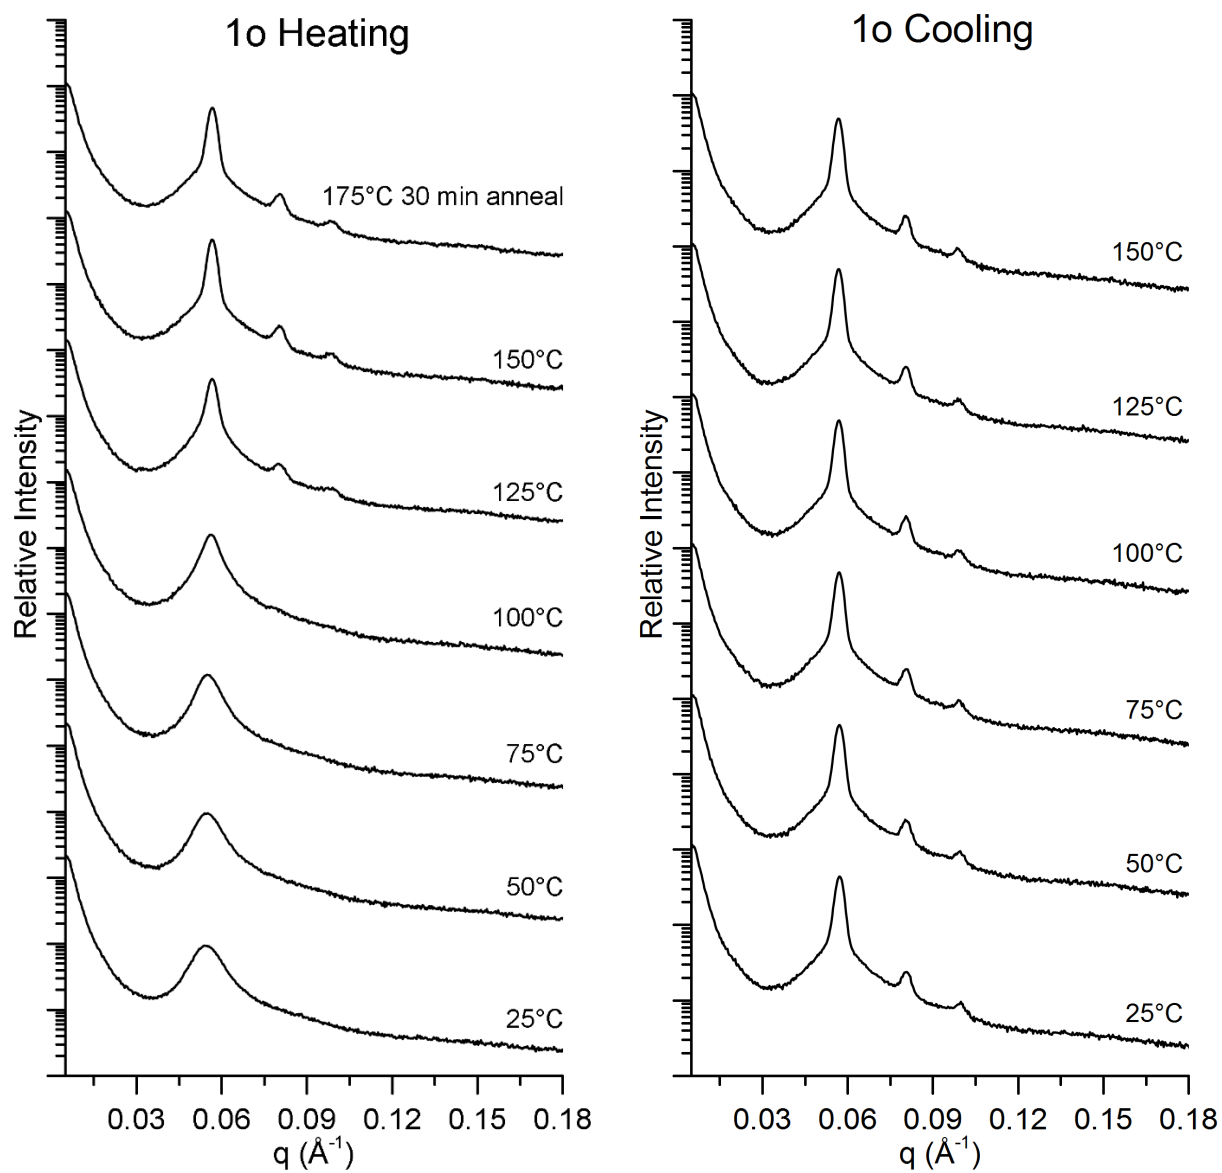

**Figure S3.10** Temperature-dependent SAXS profiles for PS-PIL BCP sample **1o**.

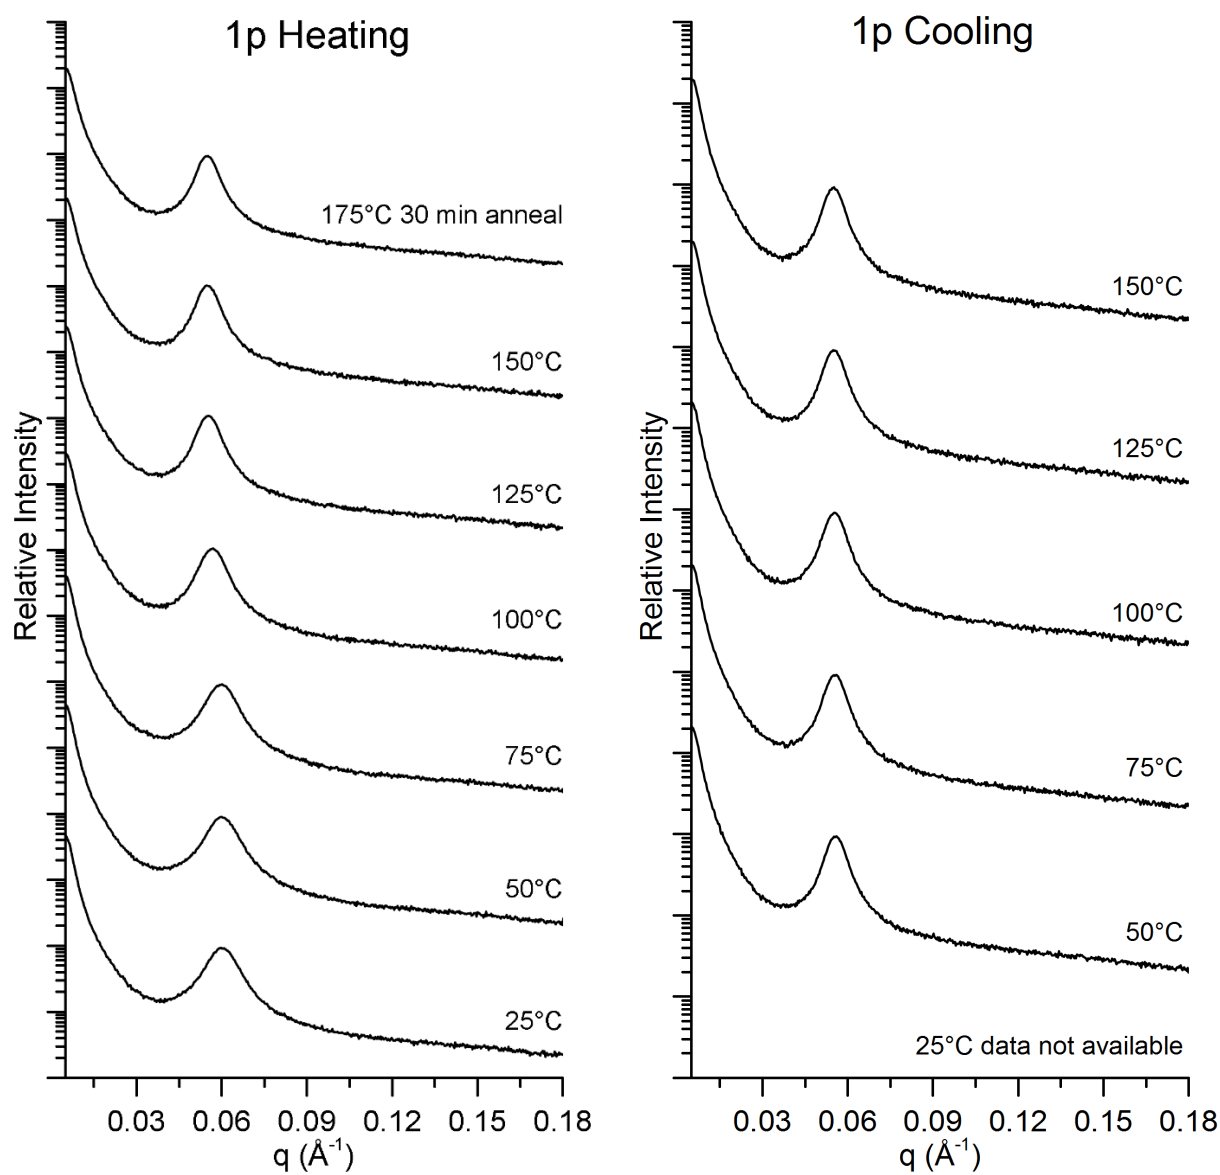

**Figure S3.11** Temperature-dependent SAXS profiles for PS-PIL BCP sample **1p**.

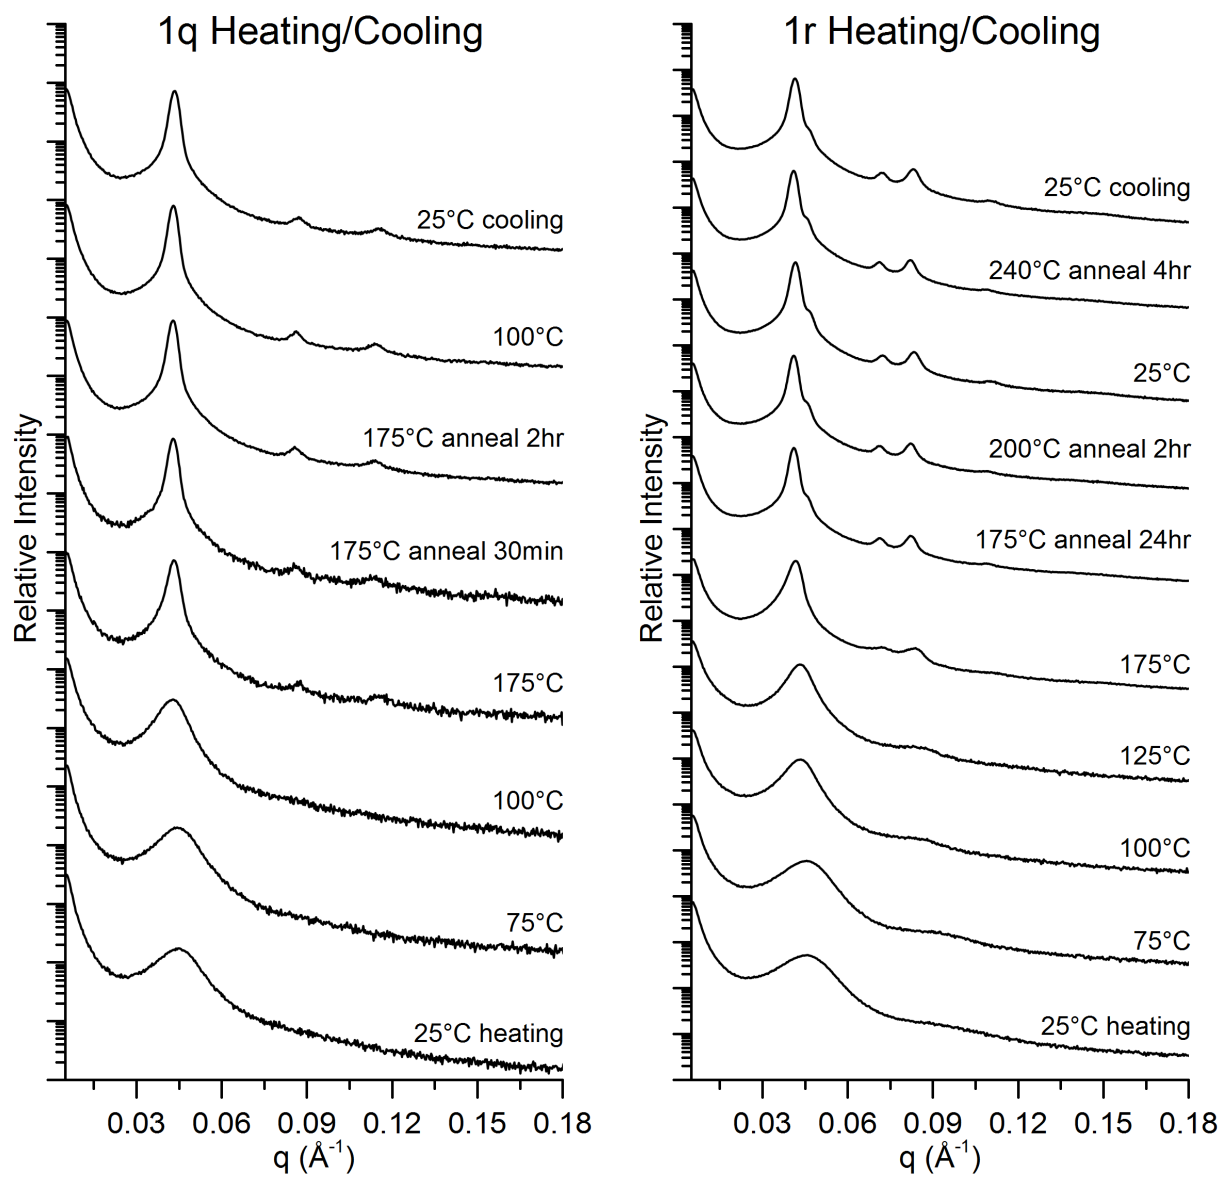

**Figure S3.12** Temperature-dependent SAXS profiles for PS-PIL BCP samples **1q** and **1r**.



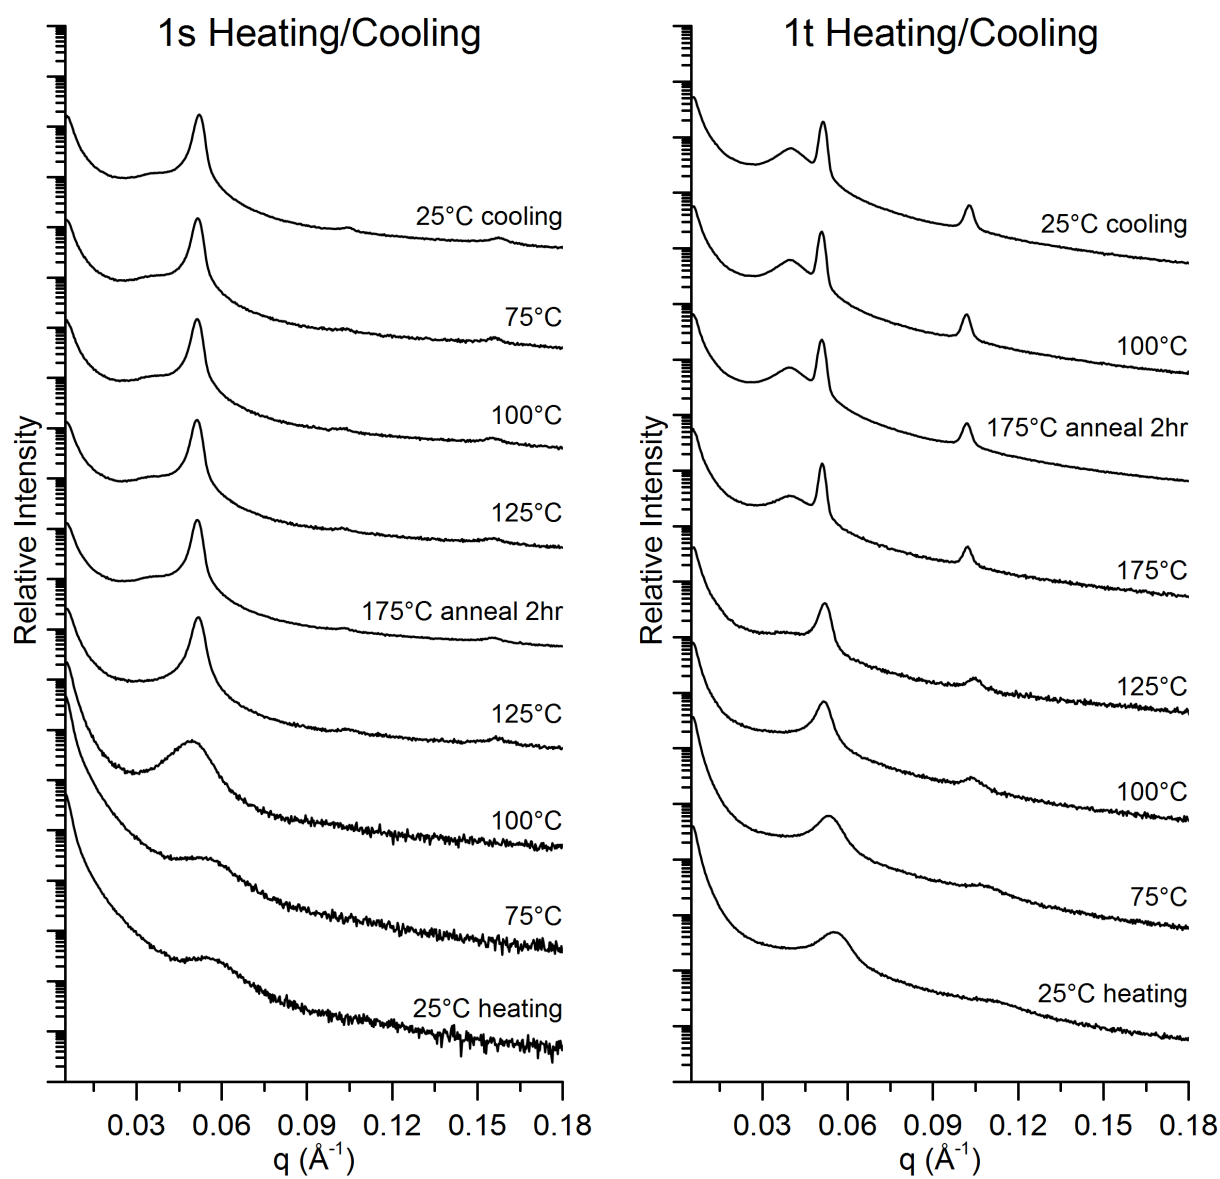

**Figure S3.13** Temperature-dependent SAXS profiles for PS-PIL BCP samples **1s** and **1t**.

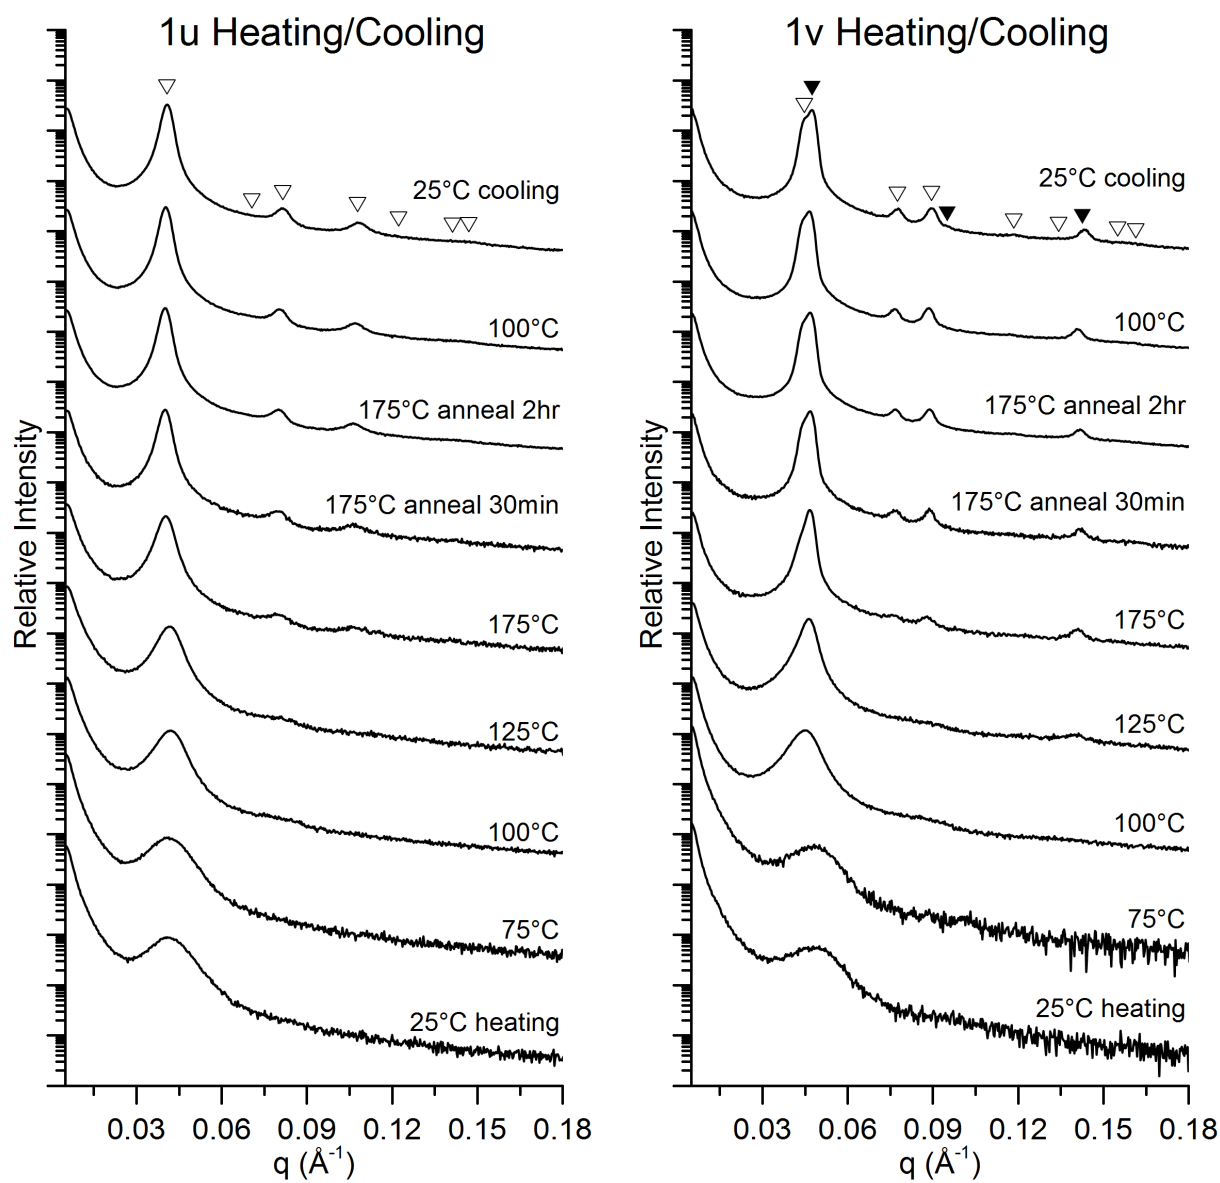

**Figure S3.14** Temperature-dependent SAXS profiles for PS-PIL BCP samples **1u** and **1v**.

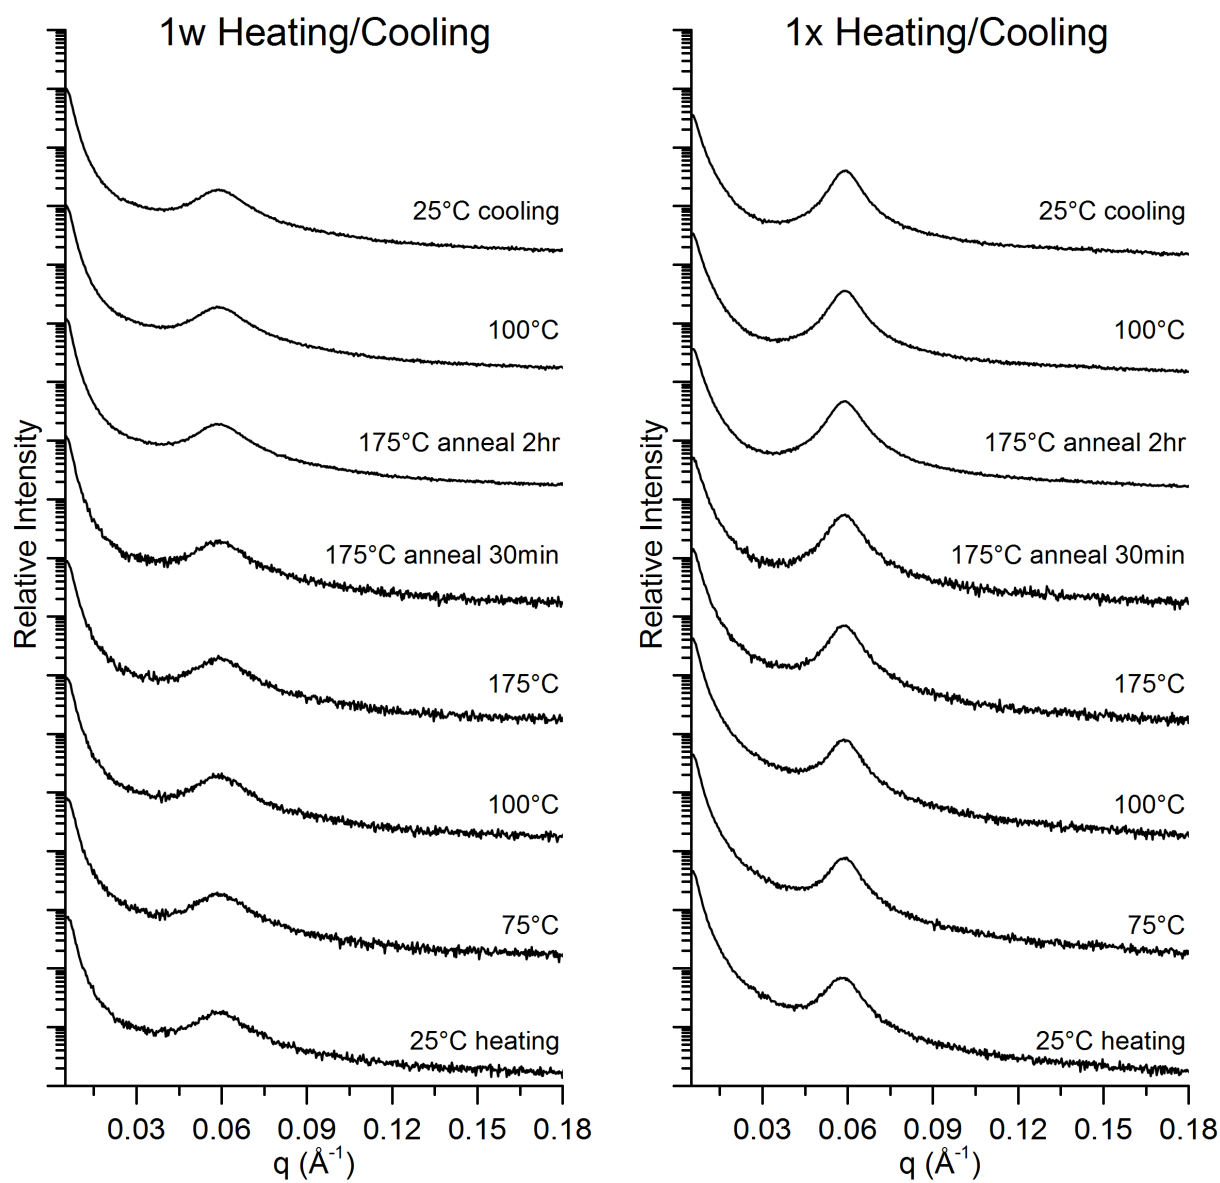

**Figure S3.15** Temperature-dependent SAXS profiles for PS-PIL BCP samples **1w** and **1x**.

#### 4) Thermal Gravimetric Analysis (TGA)

TGA was run on three PS-PIL BCPs, **1j**, **1r**, and **1t**. All measurements were performed under nitrogen atmosphere with a temperature ramp rate of 10 °C/min from room temperature to 400 °C. No degradation of any sample was observed until 180 °C or higher, with onset degradation temperatures (at 10% weight loss) around 360 °C for all three samples.

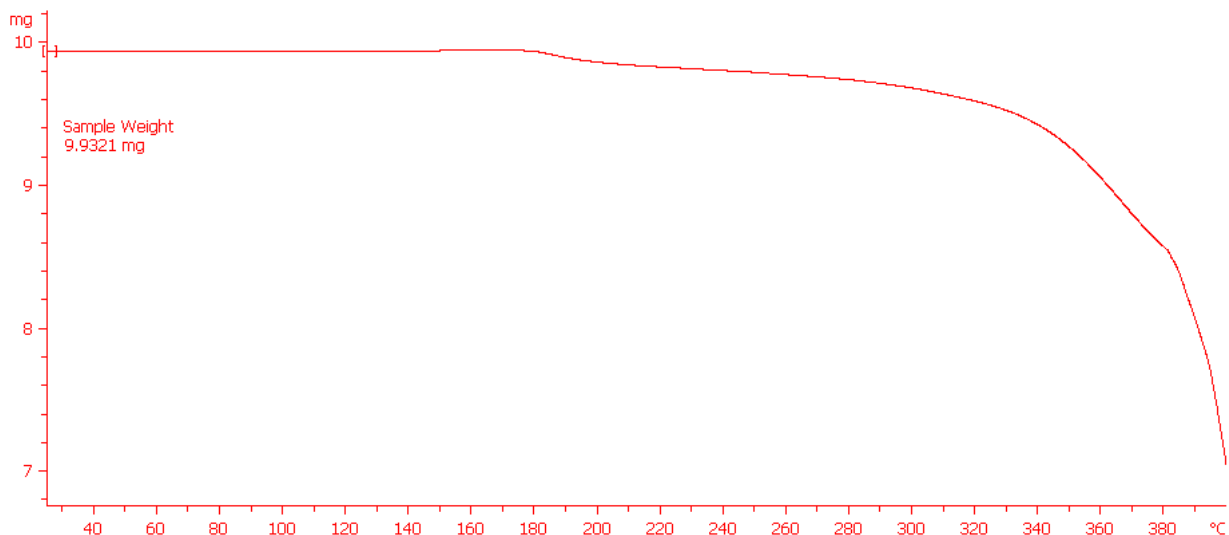

**Figure S4.1.** TGA curve for sample **1j**.

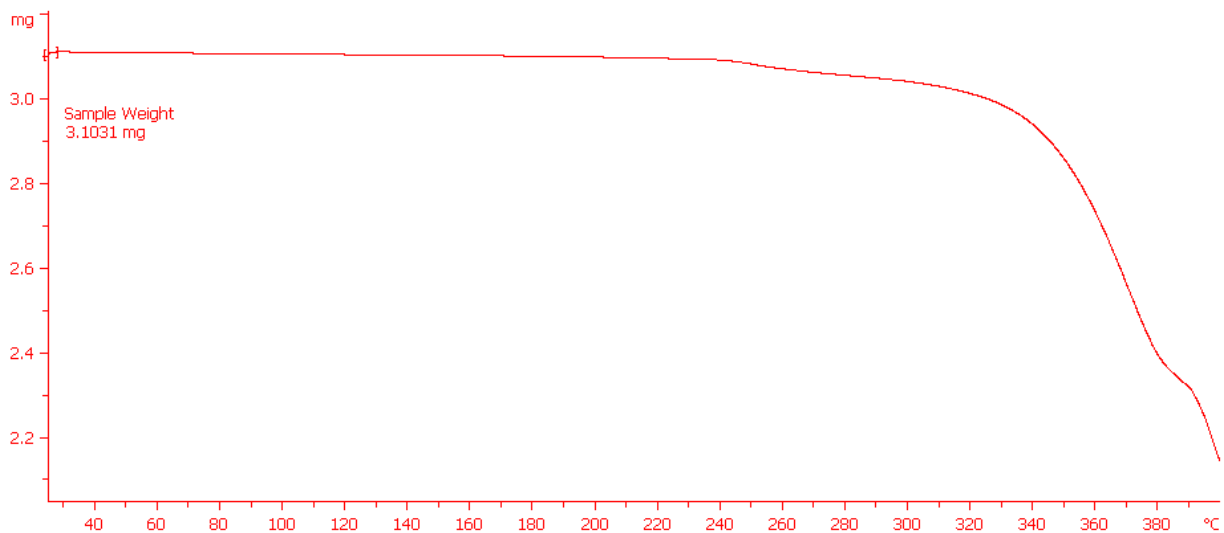

**Figure S4.2.** TGA curve for sample **1r**.

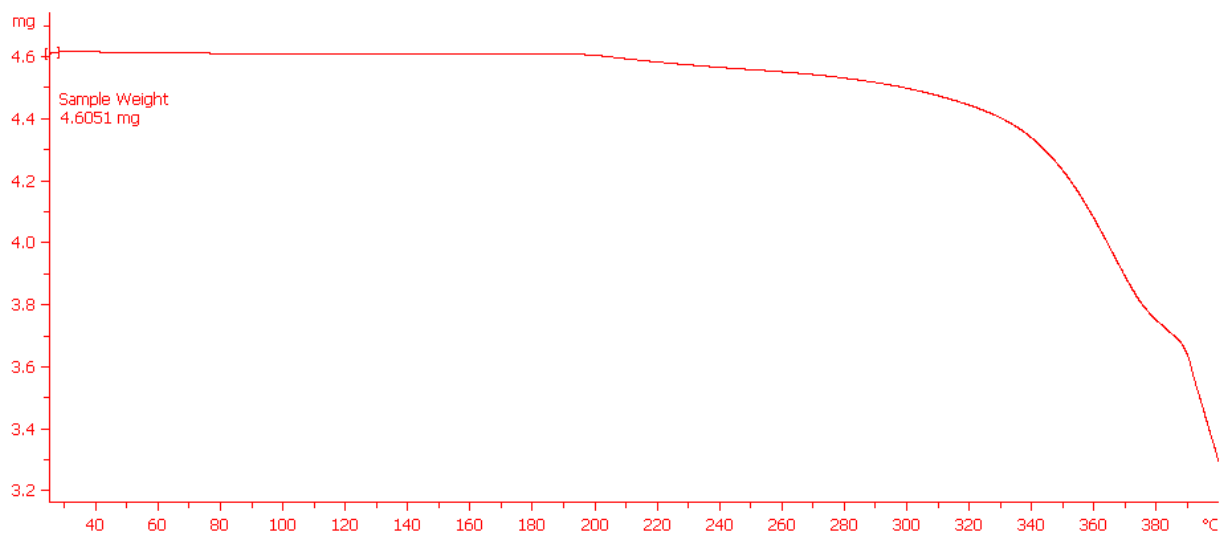

**Figure S4.3.** TGA curve for sample **1t**.

## 5) Differential Scanning Calorimetry (DSC)

DSC was run on three PS-PIL BCPs, **1d**, **1g**, and **1k**, using a heat-cool-heat-cool method at  $10\text{ }^{\circ}\text{C min}^{-1}$  from  $-40\text{ }^{\circ}\text{C}$  to  $180\text{ }^{\circ}\text{C}$ . Weak transitions around  $32\text{ }^{\circ}\text{C}$  and  $80\text{ }^{\circ}\text{C}$  were observed for these three BCP samples. The transition at approximately  $80\text{ }^{\circ}\text{C}$  is likely the  $T_g$  of the PS block, and any transitions at lower temperatures can be attributed to the MePIL block, which is more liquid-like in character due to the IL moiety. It is also possible that no transition is observed for the MePIL block of sample **1k** due to the low degree of polymerization of the MePIL block.

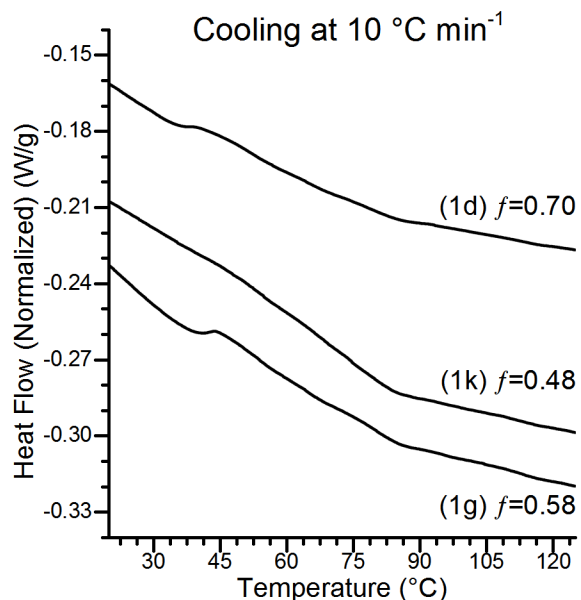

**Figure S5.** Differential scanning calorimetry data for samples **1d**, **1g**, and **1k**.

## 6) Gel Permeation Chromatography (GPC)

The following samples were run on a Viscotek GPC-Max chromatography system fitted with three 7.5 x 300 mm PolyPore (Agilent) columns in series, an Alltech external column oven set to 40 °C, and a Viscotek differential refractive index (RI) detector. 10mM LiTf<sub>2</sub>N in THF was used as the eluent,<sup>2</sup> and flow rate was 1.0 ml min<sup>-1</sup>. PS-MePIL samples **1g**, **1d**, and **1i** are plotted below, as compared to an ~8700 Da PS sample with a Đ < 1.10. Sample **1i** has a molecular weight comparable to that of the PS sample. The PS-MePIL samples all show significant peak widths (all greater than 6 minutes) and variable peak shape. Additionally, sample **1d** is 3400 Da larger than sample **1i**, and should elute earlier than the smaller **1i**, which suggests that column interactions are complicating the elution of these polymers. Based on this evidence, we believe that definitive analysis of these materials with the GPC methodology from ref. 2 is unfeasible.

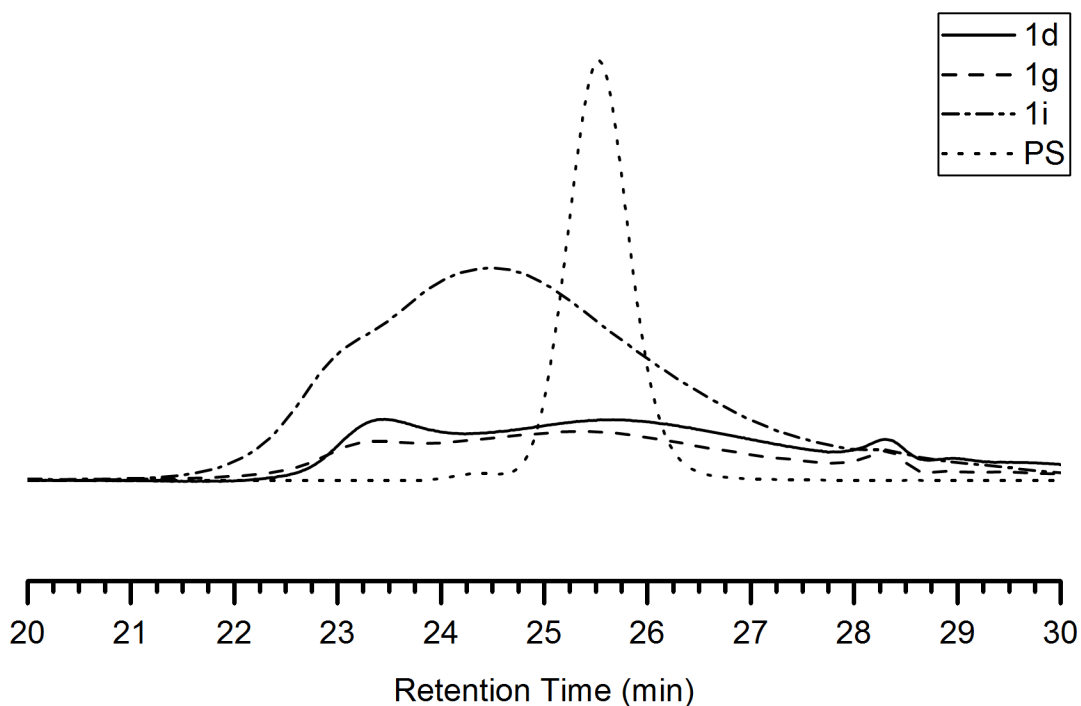

**Figure S6.** Gel permeation chromatography (GPC) results for selected PS-MePIL BCPs, **1g**, **1d**, and **1i**, compared to an uncharged PS homopolymer with low dispersity and a comparable molecular weight.

## 7) References for the Supporting Information

- 1 Z. Shi, B. S. Newell, T. S. Bailey and D. L. Gin, *Polymer*, 2014, **55**, 6664–6671.
- 2 H. He, M. Zhong, B. Adzima, D. Luebke, H. Nulwala and K. Matyjaszewski, *J. Am. Chem. Soc.*, 2013, **135**, 4227–4230.
